# Supplementary material
Source: MDPI journal article supplement (https://www.mdpi.com/2073-4441/12/6/1605)
Supplement: s1 [file s1]

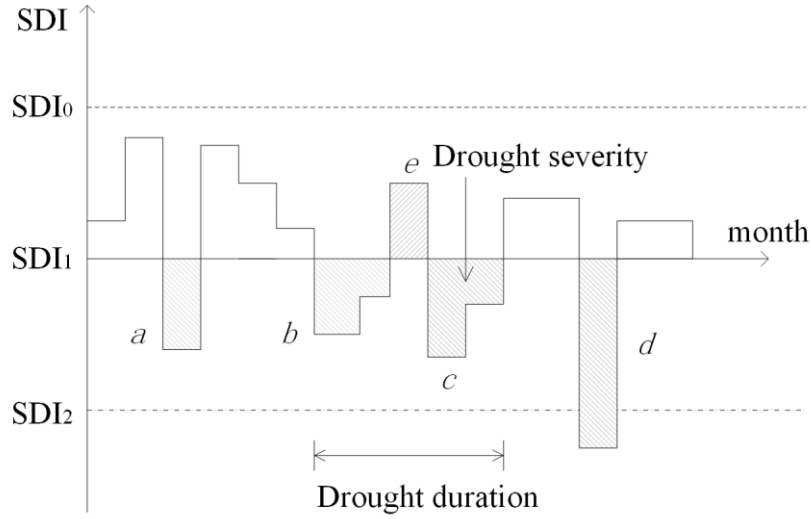

**Figure S1.** Identification of hydrological drought (HD) events.

#### Explanations for Figure S1:

Taking Figure S1 as an example to illustrate the process of HD events identification and the meanings of drought duration and severity. Three thresholds  $SDI_0$ ,  $SDI_1$ , and  $SDI_2$  are applied in HD events identification. Four candidate HD events  $a$ ,  $b$ ,  $c$  and  $d$  are preliminarily identified based on  $SDI_1$ . The duration of the events  $a$  and  $d$  is only one month, however, because the SDI value of  $a$  event is greater than  $SDI_2$ , it is excluded from the candidate drought events. Although SDI values in events  $b$  and  $c$  are also greater than  $SDI_2$ , they are preserved because their duration is longer than one month. Moreover, because the interval between two events  $b$  and  $c$  is only one month and the SDI value of that month is less than  $SDI_0$ , then  $b$  and  $c$  are combined into one drought event. Finally, two HD events  $b-c$  and  $d$  are identified. The duration of a HD event is from the beginning to the end of the HD event. The area with SDI less than  $SDI_1$  is considered as HD severity, and the severity of  $b-c$  event is the area of  $b + c - e$ . The thresholds of  $SDI_0$ ,  $SDI_1$ , and  $SDI_2$  are respectively set with 0, -0.5 and -1 in this study according to the classification of HD events and the hydrological information and forecasting standard of China.
